1 LRH: Anderson et al.

2 RRH: Honey bee Queen Microbiota

3

4 **Title:** The Queen Gut Refines with Age: Longevity Phenotypes in a Social Insect Model

5

6 **Authors:** Kirk E. Anderson<sup>1,3,4,\*</sup>, Vincent A. Ricigliano<sup>1,4</sup>, Brendon M. Mott<sup>1</sup>, Duan C.  
7 Copeland<sup>2</sup>, Amy S. Floyd<sup>3</sup>, and Patrick Maes<sup>3</sup>

8

9 1 USDA-ARS Carl Hayden Bee Research Center, Tucson, AZ 85719

10 2 Department of Microbiology, School of Animal & Comparative Biomedical Sciences;  
11 University of Arizona, Tucson, AZ, USA 85721

12 3 Department of Entomology and Center for Insect Science, University of Arizona, Tucson, AZ,  
13 USA 85721

14 4 Authors contributed equally

15 \*Corresponding author: Email: [kirk.anderson@ars.usda.gov](mailto:kirk.anderson@ars.usda.gov)

16 Author emails

17 [Vincent.Ricigliano@ars.usda.gov](mailto:Vincent.Ricigliano@ars.usda.gov)

18 [Brendon.Mott@ars.usda.gov](mailto:Brendon.Mott@ars.usda.gov)

19 [Duan.Copeland@ars.usda.gov](mailto:Duan.Copeland@ars.usda.gov)

20 [Amy.Floyd@ars.usda.gov](mailto:Amy.Floyd@ars.usda.gov)

21 [pmaes@email.arizona.edu](mailto:pmaes@email.arizona.edu)

22

23 Mailing address: Carl Hayden Bee Research Center, USDA-ARS, 2000 E. Allen Rd., Tucson,  
24 AZ 85719. Phone: (520) 820-7186 Fax: (520) 670-6493.

25

26 **Keywords:** Honey bees, Acetobacteraceae, *Bifidobacterium*, *Parasaccharibacter apium*,  
27 *Lactobacillus kunkeei*, ileum, aging, core microbiota, bacteria, oxidative stress

28

## 29 Abstract

30 **Background:** In social insects, identical genotypes can show extreme lifespan variation providing a  
31 unique perspective on age-associated microbial succession. In honey bees, short and long-lived host  
32 phenotypes are polarized by a suite of age-associated factors including hormones, nutrition, immune  
33 senescence and oxidative stress. Similar to other model organisms, the aging gut microbiota of short-lived  
34 (worker) honey bees accrue Proteobacteria and are depleted of *Lactobacillus* and *Bifidobacterium*,  
35 consistent with a suite of host senescence markers. In contrast, long-lived (queen) honey bees maintain  
36 youthful cellular function without expressing oxidative stress genes, suggesting a very different host  
37 environment for age-associated microbial succession.

38 **Results:** We sequenced the microbiota of 63 honey bee queens exploring two chronological ages and four  
39 alimentary tract niches. To control for individual variation we quantified carbonyl accumulation in queen  
40 fat body tissue as a proxy for biological aging. We compared our results to the age-specific microbial  
41 succession of worker guts. Accounting for queen source variation, two or more bacterial species per niche  
42 differed significantly by queen age. Biological aging in queens was correlated with microbiota  
43 composition highlighting the relationship of microbiota with oxidative stress. Queens and workers shared  
44 many major gut bacterial species, but differ markedly in community structure and age succession. In stark  
45 contrast to aging workers, carbonyl accumulation in queens was significantly associated with increased  
46 *Lactobacillus* and *Bifidobacterium* and depletion of various Proteobacteria.

47 **Conclusions:** We present a model system linking changes in gut microbiota to diet and longevity, two of  
48 the most confounding variables in human microbiota research. As described for other model systems,  
49 metabolic changes associated with diet and host longevity correspond to the changing microbiota. The  
50 pattern of age-associated succession in the queen microbiota is largely the reverse of that demonstrated  
51 for workers. The guts of short-lived worker phenotypes are progressively dominated by three major  
52 Proteobacteria, but these same species were sparse or significantly depleted in long-lived queen  
53 phenotypes. More broadly, our results suggest that lifespan evolution formed the context for host-  
54 microbial interactions and age-related succession of honey bee microbiota.

55

## 56 Background

57 Honey bees (*Apis mellifera*) function as a cooperating group of individuals (colonies)  
58 characterized by division of labor [1]. Reproduction is performed by long-lived queen  
59 phenotypes while short-lived workers perform a variety of nutrient processing and other tasks  
60 that support the reproductive effort [2]. While both longevity phenotypes can result from  
61 identical genomes, queens live >10X as long as workers and consume a very different diet [3].  
62 Beginning as newly hatched larvae, queen vs. worker (caste) development is controlled by  
63 signaling molecules found in different diets. Pollen exposure halts queen development while  
64 royal jelly promotes queen development [4,5]. Nurse workers gorge on pollen to synthesize royal  
65 jelly fed to queens throughout their lives. Royal jelly is functionally analogous to mammalian  
66 breast milk comprised of a complete diet and antioxidant, antimicrobial and immunoregulatory  
67 properties [6,7]. Attributed to caste-specific diets, the phospholipid profile of aging workers  
68 becomes increasingly susceptible to oxidative stress, but the queen profile remains stable with

69 age [8]. Consistent with these results, antioxidant gene expression increases in aging workers  
70 but not queens [9,10]. Workers live longer when fed the queen diet (royal jelly) as compared to a  
71 pollen diet [11]. Collectively, these results suggest that the drastically different lifespans and  
72 diets associated with division of labor in honey bees provides a model for mechanisms of diet,  
73 aging and microbiota [12,13].

74  
75 Division of labor in social insects is organized around nutrition and reproduction. In honey bees,  
76 this social organization is attributed to the evolutionary repurposing of an egg yolk glyco-  
77 lipoprotein (vitellogenin) to serve as nutritional currency throughout the colony [14]. The oldest  
78 honey bees leave the hive to forage for nectar, pollen and water. Collected pollen is converted by  
79 young workers into two major forms of nutritional currency, one internal; vitellogenin, expressed  
80 mostly by abdominal fat body, and one external; royal jelly, shared as social currency among  
81 nestmates. In workers, much of the vitellogenin released into the hemolymph is diverted to  
82 worker head glands to produce royal jelly [15]. Royal jelly secretions from young (nurse) bees  
83 are fed via oral trophallaxis to growing larvae and the queen. In turn, much of the royal jelly fed  
84 to queens is converted internally to vitellogenin, to support massive egg production [14].  
85 Vitellogenin is expressed constitutively throughout the queens internal anatomy [9,16]. Like  
86 royal jelly, vitellogenin is a multipurpose superfood that functions in immunity, detoxification,  
87 oxidative stress, nutrition and longevity [9,16–18]. Older foragers no longer produce jelly, but  
88 often beg for and receive small doses from younger nurse bees.

89  
90 Reproductive division of labor underlies changes in microbiota composition both proximately  
91 and ultimately [19,20]. Workers feeding queen vs. worker-destined larvae differ markedly for  
92 antimicrobial gene expression associated with royal jelly production in their head glands [21].  
93 Following emergence as winged adults, queen and worker guts are colonized by very different  
94 microbiota [20,22,23]. Although highly antimicrobial, the queen's diet of royal jelly enhances  
95 the growth *in vitro* of at least two bacterial species associated with the queen microbiota [7].  
96 Accordingly, the worker phenotype is affected by pollen consumption that occurs concurrent  
97 with adult succession of gut microbiota [24]. Experiments with conventionalized honey bee  
98 workers and pollen consumption indicate that bacterial fermentation products from recalcitrant  
99 pollen shells produced in the gut influence host insulin signaling and the production of  
100 vitellogenin [25]. Vitellogenin and life expectancy decrease dramatically as workers transition to  
101 foraging and the hindgut microbiota shifts with age [8].

102 In worker hindguts, fermentation products of gut bacteria are produced according to microbiota  
103 structure [25]. A variety of environmental insults can perturb microbiota structure (dysbiosis),  
104 altering immune expression, producing oxidative damage and host inflammation [25–28].  
105 Dysbiotic workers suffer developmental deficiencies and early mortality suggesting that the  
106 suppression of oxidative stress via microbiota maintenance is critical for gut health and host  
107 longevity [25,29]. Similar to gut dysbiosis in response to early life insult, age-associated  
108 succession of gut microbiota in worker bees shows increased Proteobacteria with relative

109 decreases in core *Bifidobacterium* and *Lactobacillus*, the same general results found in many  
110 other microbiota models including insects and mammals [12,30]. Unlike workers, the queen does  
111 not show greater antioxidant expression with age suggesting that antioxidant function is  
112 performed differently or managed by her diet [9]. Vitellogenin hemolymph concentration,  
113 constant royal jelly ingestion, and perhaps the microbiota contribute to antioxidant function in  
114 long-lived queens.

115  
116 While research on the worker microbiota has progressed rapidly, little is known of queens. Based  
117 on a small sample size and 16S rRNA gene sequencing (amplicons) from whole guts, the queen  
118 and worker microbiota differ in taxonomic membership and community structure [19,20,31].  
119 Unlike workers, the early queen gut seems dominated by two distinct species of  
120 Acetobacteraceae, *P. apium* and an unnamed species referred to as “Alpha 2.1” [12]. Alpha 2.1 is  
121 prevalent in guts of older workers, but *P. apium* occupies a variety of nutrition rich niches  
122 associated with honey bees and thrives in the presence of royal jelly [7,32,33]. Capable of gut  
123 colonization, *P. apium* is correlated with disease agents in adult bumblebees [34], and in honey  
124 bees, implicated in poor worker health, increased mortality, worker gut dysbiosis, and strain-  
125 dependent effects on larval and pupal survival [12,29,33]. Often occurring with *P. apium*,  
126 *Lactobacillus kunkeei* is prevalent/abundant in queens, but like *P. apium*, is also associated with  
127 worker disease and dysbiosis [12,35]. *L. kunkeei* is also considered a hive (not a gut) bacterium  
128 due to its association with fructose rich niches like honey and honey rich pollen storage [32,36].  
129 Thus, investigations of honey bee microbiota require a careful consideration of social and  
130 functional context including host longevity, caste specificity, developmental stage, potential  
131 refugia and transmission from nutrition related niches [22,23,37].

132 Here we test the hypothesis that lifespan differences in a social insect model are associated with  
133 age-based microbial succession. We sample known age queens from different backgrounds, and  
134 compare our findings to the extensive preexisting characterization of known age workers. We  
135 define the aging queen microbiota by deep sequencing four alimentary tract niches that differ in  
136 many ways including physiological function, pH and oxygen exposure. To accompany each  
137 amplicon library, we determine the absolute numbers of bacteria with qPCR. Finally, we  
138 quantify protein oxidation in the fat body tissue of each queen to test the hypothesis that  
139 biological age differs from chronological age, and that the accrual of oxidation products in aging  
140 queens is associated with species -specific differences in the microbiota.

## 141 **Methods**

### 142 143 **Queen sampling**

144 Our sampling design distinguished environmental exposure from chronological age. We  
145 sampled four different sets of queens; young queens (1<sup>st</sup> year, n = 31), aged 4-6 months and old  
146 queens (2<sup>nd</sup> year, n = 32) aged 16-18 months. To control for source variation we sampled old and  
147 young queens from similar and different backgrounds. The primary model contains two main

148 effects and an interaction effect, asking whether the variation in queen microbiota depends on  
149 age, background, or an interaction of both factors.

150

151 We sampled a total of 63 queens. Half (n= 32) of these queens were sourced from a large  
152 migratory beekeeping operation based in southern California. Referred to as the “CA” source,  
153 these Italian queens (*Apis mellifera ligustica*) were purchased from the same queen breeder in  
154 different years (mid-March of 2015 and 2016). Both sets of queens were sampled in mid July  
155 2016. Thus “older” CA queens (n = 16) were sampled from colonies that had survived 16.5  
156 months and experienced almond pollination and two seasons of alfalfa pollination in the Imperial  
157 valley of southern California. Following almond pollination in 2016,”young” CA queens (n =  
158 16) were introduced via colony splits in March, experienced one season of alfalfa pollination,  
159 and were sampled in at 4.5 months of age.

160

161 The other half of our sampled queens, referred to as “AZ” queens (n = 31) were sourced from  
162 two very different environmental and genetic backgrounds. We sampled “young” AZ queens (n  
163 = 15) from the Carl Hayden Bee Research Center in Tucson Arizona. Delivered and installed  
164 with 3000 young worker bees (package bees) in early May 2016, these Italian queens (*Apis*  
165 *mellifera ligustica*) were exposed to varied pollen and nectar sources typical of the Sonoran  
166 desert, but not intensive agriculture or bulk transportation events. Young AZ queens were  
167 sampled in early October, 2016 at 5.7 months of age. In contrast, old AZ queens originated from  
168 a Northern migratory beekeeping operation that raises *Apis mellifera carnica* queens. These  
169 queens were introduced in April of 2015 to colony splits in the foothills east of Turlock CA  
170 following almond pollination. Colonies then experienced the summer in North Dakota making  
171 honey, pollinating oilseed crops, sunflowers and canola. Colonies then overwintered in a  
172 temperature controlled warehouse in Idaho (November-January), and pollinated almonds in  
173 central California (February). The colonies were then delivered to Tucson, Arizona in March of  
174 2016 where they flourished for seven months before queens were sampled in early October at 18  
175 months of age.

176

177 All 63 queens were collected into sterile 2.0ml tubes and immediately frozen on dry ice and  
178 stored at -20°C for DNA extraction. Queens were dissected under sterile conditions. Four tissue  
179 types were extracted to typify the queen microbiota: mouth parts, midgut, ileum and rectum.  
180 Mouthparts were unfolded out of the head capsule and detached proximal to the labrum with  
181 sterile scissors. Individuals were then pinned through the thorax and the digestive tract was  
182 accessed by removing the dorsal abdominal sclerites. The entire digestive tract was removed and  
183 floated in 70% EtOH to wash and separate the midgut, ileum, and rectum. The abdominal fat  
184 body and attached dorsal sclerites were retained as a single unit to quantify biological age.

185

186

187

188 **Queen aging assay**

189 As a proxy for biological age, we quantified molecular by-products that cannot be excreted, but  
190 accumulate with age in abdominal fat body tissues. In honey bees the accumulation of oxidized  
191 proteins (carbonyl groups) in the fat body is recognized as a marker of chronological age [38].  
192 Carbonyl content of total fat body protein homogenates was determined using a commercially  
193 available kit (MAK094; Sigma-Aldrich). Briefly, whole fat bodies were homogenized in 600ul  
194 of 1X TE buffer. The supernatant was treated with a final concentration of 10 mg/ml  
195 streptozotocin to precipitate nucleic acids. The supernatant was decanted then reacted with 2,4-  
196 dinitrophenylhydrazine (DNPH) to form stable dinitrophenyl hydrozone adducts. Derivatized  
197 proteins were precipitated with trichloroacetic acid and were washed three times with acetone.  
198 The samples were resuspended in 100ul of 6M guanidine (pH 2.3). Protein oxidation, expressed  
199 as nanomoles of carbonyl groups per milligram of protein was calculated by absorbance at 345  
200 nm relative to the millimolar extinction coefficient of aliphatic hydrozones ( $22.0 \text{ mM}^{-1} \text{ cm}^{-1}$ ).  
201 The protein content of each sample was determined using a bicinchoninic acid (BCA) assay [39].  
202

203 **DNA extraction and qPCR**

204 Dissected tissues were placed immediately into 2-ml bead-beating tubes containing 0.2 g of 0.1-  
205 mm silica beads and 300  $\mu\text{l}$  of 1X TE buffer. Samples were bead beaten for a total of 2 minutes  
206 at 30s intervals. To each sample, 100  $\mu\text{l}$  lysis buffer (20 mM Tris-HCl, 2 mM EDTA, 5 % Triton  
207 X-100, 80 mg/ml lysozyme, pH 8.0) was added and the samples were incubated at 37°C for 30  
208 min. DNA was then purified using a GeneJet Genomic DNA Purification Kit according to the  
209 manufactures instructions for gram-positive bacteria.

210 We quantified total bacterial abundance for each of the four tissue types with a real-time  
211 PCR (qPCR) assay of 16S rRNA gene copies [40]. A standard curve was generated using a serial  
212 dilution of a plasmid standard containing a full length *Escherichia coli* 16S rRNA gene. The  
213 assay was validated for use on honey bee-associated bacteria by confirming amplification against  
214 individual plasmid templates harboring full length 16S genes corresponding to major gut  
215 phylotypes. The qPCR results were expressed as the total number of 16S rRNA gene copies per  
216 DNA extraction (200ul volume elution).

217

218 **Amplicon pyrosequencing**

219 The V6–V8 variable region of the 16S rRNA gene was amplified using PCR primers 799F  
220 (acCMGGATTAGATACCKG + barcode) and bac1193R (CRTCCMCACCTTCCTC).  
221 Amplification was performed using the HotStarTaq Plus Master Mix Kit (Qiagen, USA) under  
222 the following conditions: 94 °C for 3 min, followed by 28 cycles of 94 °C for 30 s, 53 °C for 40 s  
223 and 72 °C for 1 min, with a final elongation step at 72 °C for 5 min. PCR products were  
224 confirmed using a 2% agarose gel. PCR products were used to prepare DNA libraries following  
225 Illumina TruSeq DNA library preparation protocol. Sequencing was performed on a MiSeq at the  
226 University of Arizona Genetics Core.

227

## 228 **Pyrotagged sequence analysis**

229 Amplicon sequences were processed using MOTHUR v.1.35.0 [41]. Forward and reverse reads  
230 were joined using the make.contigs command. After the reads were joined the first and last five  
231 nucleotides were removed using the SED command in UNIX. Using the screen.seqs command  
232 sequences were screened to remove ambiguous bases. Unique sequences were generated using  
233 the unique.seqs command. A count file containing group information was generated using the  
234 count.seqs command. Sequences were aligned to Silva SSUREF database (v102) using the  
235 align.seqs command. Sequences not overlapping in the same region and columns not containing  
236 data were removed using the filter.seqs command. Sequences were preclustered using the  
237 pre.culster command. Chimeras were removed using UCHIME [42] and any sequences that were  
238 not of known bacterial origin were removed using the remove.seqs command. All remaining  
239 sequences were classified using the classify.seqs command. All unique sequences with one or  
240 two members (single/doubletons) were removed using the AWK command in UNIX. A distance  
241 matrix was constructed for the aligned sequences using the dist.seqs command. Sequences were  
242 classified at the unique level with the RDP Naive Bayesian Classifier [43] using a manually  
243 constructed training set containing sequences sourced from the greengenes 16S rRNA database  
244 (version gg\_13\_5\_99 accessed May 2013), the RDP version 9 training set, and all full length  
245 honeybee-associated gut microbiota on NCBI (accessed July 2013). OTUs were generated using  
246 the cluster command. Representative sequences for each OTU were generated using the  
247 get.oturep command. To further confirm taxonomy, resulting representative sequences were  
248 subject to a BLAST query using the NCBI nucleotide database. Diversity indices were  
249 generated using the rarefaction.single and summary.single (alpha diversity) commands.

250

## 251 **Statistical analysis**

252 To examine the effect of community size we multiplied the proportional abundance of OTUs  
253 returned by amplicon pyrosequencing by the total bacterial 16S rRNA gene copies determined  
254 with qPCR for each individual queen and niche. All core bacterial genomes contain four 16S  
255 rRNA gene copies except *L. kunkeei* (5), *Bifidobacterium* (2) and *P. apium* (1). Acetobacteraceae  
256 Alpha 2.1 (copy number unknown) was designated a value of one, consistent with the copy  
257 number of its closest relative, *P. apium* [44]. OTUs representing non-core diversity were  
258 summed ( $\Sigma$  OTUs 10-500), corrected for community size and mean 16S rRNA gene copy  
259 number (4.2) [45], and used to assess the change in diversity abundance with chronological age  
260 and cellular damage. In this case, absolute abundance is extrapolated from relative abundance of  
261 amplicons, so remains compositional.

262

263 To allow the use of parametric multivariate analyses [46], we converted bacterial abundances to  
264 ratios among all OTUs [47] using the software CoDaPack's centered log-ratio (CLR)  
265 transformation [48]. We compared microbial community structure by chronological age and  
266 source using a two-way factorial MANOVA and a post-hoc test to compare specific bacteria  
267 across conditions. We compared absolute abundance of each bacterial taxon by age without

268 reference to source variation using the Wilcoxon rank sum test. Finally we examined the  
269 relationship between carbonyl accumulation and the microbiota in various ways: 1) Using  
270 DistLM we test whether the microbiota from each of four distinct tissues is significantly  
271 associated with carbonyl accumulation in queens, 2) We examine carbonyl accumulation as a  
272 covariate in three separate MANCOVA models, a two-way examining source and age, a one-  
273 way examining source, and a one-way examining age, 3) We calculate independent Pearson's  
274 correlations between species-specific CLR scores and log transformed carbonyl data, and 4) We  
275 perform principle component analysis, plotting the relationship of bacterial community  
276 composition and age associated succession relative to carbonyl accumulation by niche. For the  
277 extended queen data set we calculated correlations among the top 200 OTUs using Sparse  
278 Correlations for Compositional data algorithm [SparCC:[49]] as implemented in mothur [41].  
279 SparCC is robust for compositional data sets with a low effective number of species [50].  
280 Analyses were conducted in JMP\_ v11 (JMP\_ 1989–2007) and/or SAS\_ v9.4 [51].

281  
282 We compare our queen results to worker data from a recently published manuscript [19]. As one  
283 of three studies sequencing both nurses and foragers, the Kwong *et al.* study is the largest and  
284 most robust, and provides whole gut microbiota based on 16S rRNA gene sequences from  
285 worker *Apis mellifera*;  $n = 84$  workers; 19 foragers (old) and 65 in-hive bees (young). From this  
286 data set we designated eight core gut bacteria representing 95% of OTU abundance based on  
287 known samples of whole gut communities in the literature. The remaining 5% OTU abundance  
288 from [19] was comprised primarily (83%) of Proteobacteria, occurred with sporadic abundance  
289 and prevalence across many worker studies, and was combined as an “OTHER” category to  
290 represent low abundance bacteria or signs of dysbiosis. As stated above for queens, we CLR  
291 transformed relative abundance measures of workers, and performed a one-way MANOVA on  
292 age to compare forager vs. in-hive bee gut microbiotas, calculating post-hoc differences between  
293 specific bacterial groups. To compare the queen and worker results we transform our tissue-  
294 specific queen data to reflect relative abundance values predicted for the whole gut. Tissue  
295 specific bacterial cell counts were used to normalize the relative occurrence of bacterial species  
296 by queen tissue, then additively produce a single value that represents the expected result of  
297 sequencing whole queen guts. These whole gut values highlight differences in abundance and  
298 prevalence between workers and queens.

299

## 300 **Results**

### 301 **Next generation sequencing and qPCR**

302 Next generation sequencing returned 7.2 million quality trimmed reads (400 bp assembled)  
303 across the 252 libraries (63 queens X 4 niches). Read coverage was sufficient for all downstream  
304 characterization and statistics (Table S1). The queen rectum was represented by 2.4 million reads  
305 averaging 38K per library, the ileum by 1.9 million reads averaging 30K per library, the midgut  
306 by 1.6 million reads averaging 25K per library, and the mouth by 1.3 million reads averaging  
307 21K per library. The nine most common OTUs (97%) accounted for 98.8% of all reads across



308 the combined niches. Given the low effective number of OTUs, unique OTUs were manually  
309 assessed to verify 97% species clusters. Subtracting the rare biosphere (1.2%), these nine OTUs  
310 are what we present in figures and use in statistical analyses. All recovered species clusters  
311 correspond to previously sampled phylotypes from worker guts or hive materials. Summed  
312 across the four niches, the nine most abundant OTUs according to raw amplicon read totals were  
313 *L. firm5* (51.3%), *P. apium* (27.1%), *L. kunkeei* (7.6%), *L. firm4* (6.8%), *Alpha 2.1* (2.0%), and  
314 *Bifidobacterium* (1.5%), *S. alvi* (1.8%) and *G. apicola* (0.3%) and *Delftia* spp. (0.2%). In honey  
315 bees, *Delftia* is an unrecognized (novel) species of Burkholderiales that may prove functionally  
316 important to host physiology.

317

318 Similar to the abundance pattern in worker guts, the queen rectum harbors an average of 121.2M  
319 16S rRNA gene copies per queen, a magnitude more than the ileum (17.9M) or midgut (14.2M).  
320 The mouth (1.4 M) contains the least bacteria. Total amplicon reads returned for the mouth,  
321 midgut and ileum were significantly correlated with bacterial abundance as determined by qPCR  
322 (Table S2). Species dominance in the queen increases with community size in the mouth,  
323 midgut and ileum (Table S2). Extrapolating qPCR results to estimate absolute abundance, *P.*  
324 *apium*, and *L. kunkeei* decrease in relative abundance approaching the rectum, while *L. firm5*, *L.*  
325 *firm4*, *Bifidobacterium* and *Alpha 2.1* increase (Table S3). *S. alvi* and *G. apicola* occur  
326 sporadically at low (< 1%) relative abundance throughout all queen niches.

327

### 328 **MANOVA of queen microbiota by chronological age and source**

329 The two-way MANOVA performed for each of the four queen niches revealed significant  
330 variation due to chronological age, source and interaction (Table 1, Table S4). In the mouth, *P.*  
331 *apium* and *L. firm5* increased with age, while *Alpha 2.1* and *Delftia* were more abundant in  
332 young queens (Fig. 2). The midgut and ileum aged similarly; in both niches, *Bifidobacterium* and  
333 *L. kunkeei* were more abundant in old queens while *Alpha 2.1*, *Delftia* and “OTHER” all  
334 decreased with age (Fig. 1). Most abundant in the ileum, *S. alvi* bloomed in 4 of 63 individuals  
335 and increased with age, while *P. apium* and *G. apicola* decreased (Table S3). In the rectum,  
336 where *L. firm5* represents the majority of total gut bacteria, *Bifidobacterium* abundance increased  
337 with age while *L. firm5* and both core Acetobacteraceae (*P. apium* and *Alpha 2.1*) decreased  
338 (Fig. 2). Wilcoxon rank sum tests revealed significant differences by chronological age, many of  
339 which agree with age-specific differences detected in the two-way MANOVA (Table 1, Table  
340 S4).

341

### 342 **MANOVA of worker microbiota by age**

343 From data published in Kwong et al. (2017) we investigated age according to the behavioral role  
344 of the worker. The one-way MANOVA of microbiota by worker age (task) revealed major  
345 proportional shifts among core gut bacteria (Fig. 1). All three core Firmicutes (*Bifidobacterium*,  
346 *L. firm5* and *L. firm4*) decreased significantly with age while “OTHER” bacteria,  
347 Acetobacteraceae *Alpha 2.1*, and *Bartonella apis* increased significantly (Table S5). Of note, *S.*

348 *alvi* decreased in relative abundance with age but was borderline insignificant ( $p = 0.06$ ). With  
349 reference to these results, and other worker data sets in the literature we define four worker-  
350 specific gut species, all Proteobacteria, two queen-specific species, and four species shared by  
351 longevity phenotypes (Fig. 3). In general, the species shared by longevity phenotypes are  
352 particular to the rectum while the ileum species show fidelity by longevity phenotype.

353

### 354 **Molecular age and the queen microbiota**

355 We measured carbonyl accumulation in the queen fat body as a proxy for queen molecular age.  
356 While some variation in carbonyl accumulation is due to genetics and background, difficult to  
357 excrete waste products accumulate in a clock-like fashion with age. We found that chronological  
358 age was strongly associated with carbonyl content in the fat body of the queen (Fig. 4). Carbonyl  
359 accumulation differed by both age and source (Table S6). Examining all pairwise combinations,  
360 only first year queens (CA1 and AZ1) did not differ in average carbonyl accumulation. In both  
361 sets of young and old queens, chronological age did not agree with molecular age. In both age  
362 classes, queens from the Imperial Valley of California (source CA) were chronologically  
363 younger, but biologically older with greater carbonyl accumulation (Fig. 4).

364

365 To further explore the relationship of carbonyl accumulation with queen microbiota, we  
366 ran a set of related analyses that partition variation by different strategies. Based on Bray-Curtis  
367 similarities, DistLM revealed a significant association between microbiota composition and  
368 carbonyl accumulation in each of the four tested communities (Mouth; Pseudo- $F_{61} = 4.1$ :  $P =$   
369  $0.01$ , Midgut; Pseudo- $F_{61} = 3.7$ :  $P = 0.006$ , Ileum; Pseudo- $F_{61} = 4.1$ :  $P = 0.004$ , Rectum; Pseudo-  
370  $F_{61} = 3.9$ :  $P = 0.005$ ). Although all four communities were significantly associated with carbonyl  
371 accumulation, little variation was explained by the collective community (mean  $R$ -sq =  $0.06$ ) due  
372 to opposing species variation within communities. The separation of background (source),  
373 chronological age and carbonyl accumulation via MANCOVA analyses detailed species-specific  
374 changes in the microbiota (Table S7). Pearson's correlations examining species-specific CLR log  
375 transformed OTU abundance and log transformed carbonyl values agree with the main  
376 MANCOVA results examining source as the dependent variable with carbonyl accumulation as  
377 the covariate without reference to chronological time (Table S8). Most notably, throughout the  
378 gut *Bifidobacterium* is correlated significantly with the accumulation of carbonyl in abdominal  
379 fat body tissue (Fig. 5). Although at similar abundance in chronologically old and young queens,  
380 *L. firm5* abundance was also correlated strongly and positively with carbonyl accumulation.  
381 Although rare throughout the queen gut, an undescribed Burkholderiales; *Delftia* showed the  
382 strongest negative relationship with carbonyl content, decreasing dramatically with age, and  
383 varying by source (Table 1).

384

385 To better visualize variation associated with biological age in the queen microbiota, we  
386 performed PCA analysis using centered log ratios from the top 9 OTUs and associated carbonyl  
387 values from the fat body of each queen (Fig. 5, Table S9). Across each niche the first two

388 principle components explained approximately 50% of the variation in log ratio abundance  
389 scores. Because the queen microbiota has shallow, deep and noisy structure, the third and fourth  
390 principle components for each niche explained an average of 14% and 8% respectively (Table  
391 S8). Although only 50% of the variation is presented in the two dimensional PCAs, a strong and  
392 consistent separation of two queen cohorts is realized in every niche; young Arizona (AZ1) and  
393 old California (CA2). In each niche, the carbonyl vector indicates CA2 as the oldest, and AZ1 as  
394 the youngest cohort, consistent with determinations of molecular (biological) age.

395  
396 We examined microbiota correlations using SparCC, an approach that incorporates the structure  
397 of the data matrix to identify potential species interactions and generates null expectations based  
398 on permutation of OTU columns in the transformed data matrix. Based on SparCC, the mouth  
399 and midgut reveal a number of significant positive relationships between core bacteria within  
400 niche (Table S10). We note that SparCC results are unreliable when OTU sparsity exceeds 70%  
401 zero values but robust to communities with a low effective number of species (see Table 1). The  
402 ileum reveals a marked decrease in positive relationships, and the first occurrence of significant  
403 negative relationships. As the relevant dynamic, the two major Acetobacteraceae (*Alpha 2.1* and  
404 *P. apium*) associate positively in the ileum, but both associate negatively with *L. Firm5* and  
405 *Bifidobacterium*. The strongest negative correlation occurs between *L. firm5* and *P. apium*, the  
406 two most abundant ileum species (Table S10). With more detailed investigation, age-specific  
407 Pearson's correlations on log transformed absolute abundance shows that as queens age, the  
408 relationship of *L. firm5* / *P. apium* cell number shifts from mildly negative (Pearson's  $r = -0.27$ ,  $p$   
409  $< 0.07$ ) to strongly positive (Pearson's  $r = 0.49$ ,  $p < 0.005$ ), concurrent with the loss of  
410 Acetobacteraceae (*Alpha 2.1* and *P. apium*).

411

## 412 Discussion

413 We show that host phenotypes with extreme longevity differences support gut microbiotas that  
414 age differently (Fig. 1). Because long and short-lived phenotypes are produced from the same  
415 genotype, microbiota establishment and age-associated changes likely reflect host gene  
416 expression and environmental exposure, primarily diet. Long-lived (queen) phenotypes are fed  
417 royal jelly throughout their lives to replenish internal levels of vitellogenin. In their youth, short-  
418 lived (worker) phenotypes consume pollen to produce a discrete pulse of vitellogenin that fuels  
419 royal jelly synthesis in their head glands. In old age, workers forage for pollen and nectar  
420 consuming honey to support flight metabolism. This fundamental difference in diet and task  
421 reflects a suite of age-associated host gene expression, highlighted by differences in immunity,  
422 insulin signaling and antioxidant levels [9,14,16,25,52,53]. These core changes in host  
423 physiology are consistent with the distinct microbiota compositions and age-based succession of  
424 honey bee longevity phenotypes (Fig. 1). In general, aging worker guts show decreased  
425 Firmicutes and increased Proteobacteria adding to the list of insect and mammal systems where  
426 this pattern has been documented. In stark contrast, the gut microbiota of aging queens is

427 depleted of core and other Proteobacteria, and accumulates core Firmicutes typically considered  
428 probiotic like *Lactobacillus* and *Bifidobacterium*.

429

### 430 **Longevity phenotypes differ in core membership**

431 Microbiotas of long and short-lived phenotypes differ markedly in core bacterial membership  
432 sharing four of ten species, with six species showing strong phenotype-specificity (Fig. 3). The  
433 four Proteobacteria associated with worker phenotypes show distinct patterns of rarity in queen  
434 guts. In an evolutionary context, the two most recent additions to the worker gut microbiota are  
435 *B. apis* and *F. perrara* [19]. Perhaps a result of this novelty, these bacteria exhibit a relatively  
436 narrow niche breadth. *F. perrara* is specific to the worker pylorus and results in host  
437 melanization response, while *B. apis* appears in the hindguts of older foragers [28,54–56]. In  
438 queens, *B. apis* was extremely rare and *F. perrara* not detected, not even on the mouth,  
439 suggesting that these particular Proteobacteria are not tolerated by the queen, excluded via some  
440 mechanism, or result in host death. In contrast, worker-specific *G. apicola* and *S. alvi* are  
441 tolerated at low levels in queen guts, and *S. alvi* showed sporadic abundance in 4 of 63  
442 seemingly healthy queen ileums (Fig. 2). In workers, this species pair is omnipresent, accounts  
443 for 20-60% of the ileum microbiota and represents a core syntrophic relationship critical to gut  
444 oxygen balance [25,26,57,58]. Although rare in queens, this species pair is highly correlated  
445 throughout all sampled queen niches occurring with <1% average abundance, but 70%  
446 prevalence (Fig. 3). Queen-specific bacterial species are Acetobacteraceae *Parasaccharibacter*  
447 *apium* and *Lactobacillus kunkeei*, both showing strong fidelity for queen mouth, midgut and  
448 ileum. These two species occur with sporadic abundance in worker ileums under conditions of  
449 putative dysbiosis and oxidative stress [12,23,29,34].

450

451 The four species shared by queens and workers differ in abundance and prevalence showing  
452 strong niche fidelity (Fig. 3). Of these four, only *Lactobacillus firm5* is core to both the ileum  
453 and rectum of both longevity phenotypes. Considering whole guts independent of age, queens  
454 and workers average 75% and 24% relative abundance of *L. firm5* respectively. Three of the  
455 shared core groups (*Lactobacillus firm5*, *L. firm4*, and *Bifidobacterium*) populate 100% of  
456 workers by 3-days of age [22]. Of these three, *Bifidobacterium* is significantly more abundant  
457 and prevalent in workers than queens (particularly young workers), perhaps associated with  
458 pollen consumption [24,59]. However, *Bifidobacterium* increases significantly in the hindguts of  
459 aging queens independent of pollen consumption. The fourth shared bacterium,  
460 Acetobacteraceae Alpha 2.1, is abundant in young queens but not typically detected in young  
461 workers. It decreases with queen age but becomes prevalent and abundant in older workers  
462 [19,31,60–64].

463

### 464 **The queen microbiota improves with age**

465 Our results are consistent with the body of work detailing molecular aging and oxidative stress  
466 in queens, workers and social insects in general [8–10,65]. Results from the queen carbonyl

467 assay demonstrate that queens accrue oxidative damage with age (Fig. 4), and that chronological  
468 age can differ significantly from biological age possibly due to environmental differences  
469 including climate, nutrition, toxins and other landscape variables. Despite similar signs of  
470 biological aging in both queens and workers, the gut microbiota of older queens seems to reflect  
471 a refined structure with greater efficiency. It's unlikely that queens ever develop a senescence  
472 physiology and associated microbiota as seen in workers. Under natural conditions, queens  
473 accrue molecular damage associated with aging, but are not allowed to grow "old" because  
474 fecundity is critical to colony survival, and workers routinely replace substandard queens [66].  
475 With increased oxidative damage, gram positive bacteria decrease in workers [19] but increase  
476 in queens (Fig 1). Of note, core *Lactobacillus* and *Bifidobacterium* in queens show greater  
477 correspondence with biological than chronological age suggesting that these species may track or  
478 signal host physiology (Table S7). Consistent with decreased antioxidant expression and less  
479 ROS generation in queens [9,65] the bacteria that increase with queen age do not rely on oxygen,  
480 but generate continuous fermentative metabolism in the queen hindgut (Fig. 2). In turn, these  
481 fermentation products (i.e. butyrate) are considered fundamental to host physiology and  
482 homeostasis [25,59].

483  
484 Results from conventionalized bee experiments suggest that butyrate produced by the honey bee  
485 hindgut microbiota plays a key role in host metabolism [25,59]. In human colons, positive  
486 butyrogenic effects are considered a result of cross feeding by butyrate-producing Firmicutes and  
487 *Bifidobacterium* [67]. Feeding worker honey bees relevant amounts of sodium butyrate results in  
488 gene expression considered beneficial to general health, broadly affecting immunity and  
489 detoxification [68]. We found that bacterial communities implicated in butyrate production were  
490 diminished in aging workers but seemingly enhanced in aging queens. Better explained by  
491 biological than chronological age (Fig. 5), *Bifidobacterium* increases significantly with age in the  
492 queen midgut, ileum and rectum (Table S7). Moreover, *L. kunkeei* increases in the midgut and  
493 ileum, while community changes in the ileum favor the persistence of *L. firm5* (Table 1), and  
494 suggest a more efficient relationship emerges with queen age. *Lactobacillus firm5* is the most  
495 plentiful bacteria in the queen hindgut, and combined with increased *Bifidobacterium*, may add  
496 to the butyrogenic effect in queens concurrent with increased biological age. *Bifidobacterium*  
497 itself was recently identified as a major bacterium associated with host-derived signaling  
498 molecules in worker honey bees [59]. Interestingly, *Bifidobacterium* abundance in both queens  
499 and workers is often low and/or highly variable so may be affected by diet or strain variability  
500 [24].

501  
502 We compared the gut microbiota of young in-hive bees to older foragers within and among  
503 studies. Foraging is the last functional role workers serve before death. But as a group, both in-  
504 hive bees and foragers can range greatly in chronological age and environmental exposure [69].  
505 Also, comparing across next generation sequencing studies can be misleading due to differences  
506 in methodology like primer choice or analysis pipeline [70]. Despite these and other sources of

507 potential error, we found that the worker gut microbiota ages in a highly predictable fashion,  
508 becoming depleted of core hindgut firmicutes including *Bifidobacterium* (Fig.1). Of seven  
509 available forager studies, three used the same methods to sequence both foragers and nurses  
510 [19,31,63], and we used these studies as a point of reference for examining worker aging. We  
511 analyzed the largest and most variable of these three data sets [19] defining six significant  
512 differences in microbiota between young and old workers (Fig. 1). The collective results from six  
513 of seven studies are largely in agreement and suggest that age-associated shifts in worker  
514 microbiota are strongly predictable at the level of species despite study particulars [19,31,60–  
515 64]. The changes we report in figure 1 [19] represent a functional change from a fermentative to  
516 proteolytic hindgut environment, involving significant shifts in core bacterial structure. Alpha  
517 2.1 increases in all 7 studies, *B. apis* and “Other” bacteria in 6 of 7. One to three major core  
518 hindgut Firmicutes are depleted significantly in 6 of 7 studies, while studies were more variable  
519 concerning shifts of *S. alvi* and *G. apicola*, the species pair that dominates the worker ileum.

520

### 521 **Early gut succession**

522 Similar to workers [37], the rectum of the mature queen contains 84% of the total bacteria found  
523 in the queen gut (Fig. 2). On average, a whole gut sample from a mature laying queen would be  
524 highly biased toward rectum species, dominated by *Lactobacillus firm5* (Fig. 3). In contrast,  
525 whole gut samples of queens during the mating process show a dominant Acetobacteraceae (*P.*  
526 *apium* and Alpha 2.1) profile [20]. This finding is consistent with our detection of significantly  
527 more *P. apium* and Alpha 2.1 in the guts of younger queens (Table 1), and suggests that the  
528 bacterial succession leading to a *L. firm5* dominant hindgut in queens may require many weeks,  
529 perhaps months. Given that worker gut succession occurs throughout the life of the worker  
530 [12,22], we speculate that the early queen microbiota [20] represents a pioneer community that  
531 primes the gut environment or host immune system, and/or potentially aids disease prevention  
532 during the days-long mating process that involves queen flight metabolism and mating with >20  
533 males. A successfully mated queen is fed massive amounts of royal jelly as she begins to lay  
534 eggs. The decrease and stabilization of cell replacement rate in early queen midguts [71]  
535 suggests a more stable gut environment emerges around 40 days of age, perhaps influencing  
536 bacterial succession.

537

### 538 **Queen niche breadth**

539 In queens, the occurrence patterns and numerical dominance of *P. apium* in the mouth and  
540 midgut, and *L. firm5* in the ileum and rectum suggests that the extended gut structure is  
541 important for host function (Fig. 3). The taxonomic shift at the pylorus demarcates a steep  
542 physiological gradient in the adult bee gut. Recently characterized in workers, this change  
543 occurs just upstream of the ileum where Malpighian tubules feed host waste products back into  
544 the gut, and microoxygenic and pH gradients affect bacterial establishment and persistence  
545 [25,29,54]. Host excretions provide a different niche for bacterial co-evolution including an  
546 influx of nitrogenous waste compounds, a decrease in oxygen availability and lower pH [25].  
547 While the effect of pollen consumption on host signaling has been investigated in workers

548 [24,25], the effect of the queen's diet (royal jelly) on host signaling remains unknown. The  
549 reliable and predigested nature of the queen diet may generate very different collection of waste  
550 products, supporting hindgut bacterial strains distinct from those found in workers.

551  
552 It is mostly unknown why queens can resist many worker diseases and vice-versa. Early queen  
553 death has become more common [66,72], and defining disease states in queens will rely in part  
554 on the structure and function of native gut bacteria [12]. Although rare throughout the gut, the  
555 occurrence pattern of *Delftia* (Burkholderiales) suggests it is detrimental. Not detected in  
556 workers, *Delftia* is negatively correlated with *L. firm5* and *Bifidobacterium* in the queen hindgut,  
557 shows the greatest negative correlation with carbonyl accumulation, and decreases significantly  
558 with biological age (Table1). Congruently, *Delftia* is negatively correlated with putatively  
559 beneficial bacteria on the queen mouth and midgut (Tables S9 and S10). These two niches are  
560 dominated by distinct sequovars of *P. apium*, a bacterium co-evolved to thrive on royal jelly [7].  
561 Over 95% of the mouth/midgut bacteria classify as *P. apium* and *L. kunkeei*, both associated with  
562 decreased abundance of honey bee-specific disease caused by bacteria and microsporidia  
563 [73,74]. One primary function of microbes in the queen mouth and midgut may be the exclusion  
564 of opportunistic and disease causing microbes. Mouth communities not dominated by *P. apium*  
565 are much smaller in size and contain significantly more *Delftia*, OTU diversity and "other"  
566 bacteria (Tables S3) suggesting that *P. apium* dominance in the queen mouth and midgut limits  
567 the occurrence of detrimental bacteria in the hindgut. Older queens have significantly more *P.*  
568 *apium* on their mouths and *L. kunkeei* in their midguts that may accrue with age and/or improve  
569 queen hygiene promoting queen survival (Fig. 2). Pollen exposure and consumption may render  
570 workers more vulnerable than queens to frequent pathogen invasion. The queen and her constant  
571 diet of royal jelly may discourage novel microbial acquisition and provide a strong selective  
572 environment for the evolution of niche specialists. The constant diet of royal jelly likely  
573 represents a form of purifying selection, perhaps even an arms race at the front end of the queen,  
574 producing fierce competition among *P. apium* strains for this constant and complete nutrient  
575 source.

576

### 577 **Evolution of "queen-specific" gut bacteria**

578 *P. apium*, *L. kunkeei*, and close ancestors occur throughout solitary and social bees and may even  
579 predate the evolution of corbiculate bees [19,75–79]. Both *P. apium* and *L. kunkeei* grow at  
580 extreme sugar concentrations and royal jelly enhances the invitro growth of some strains [7,33].  
581 The evolution of host behavior to mechanically concentrate nectar sugars via evaporation was  
582 likely a key innovation producing strong selection for these two osmotolerant symbionts.  
583 Bacteria adapted to survive in concentrated nectar of solitary bee provisions were well positioned  
584 to develop greater fidelity with the host gut. The mature worker ileum is dominated by core  
585 bacteria *S. alvi* and *G. apicola* that co-occur in a biofilm with lesser amounts of *Lactobacillus*  
586 *firm5* [12]. In contrast, the mature queen ileum is dominated by *Lactobacillus firm5* that co-  
587 occurs with lesser amounts of core gut bacteria *P. apium* and *L. kunkeei* (Fig 1). Reciprocally,

588 worker ileum bacteria *S. alvi* and *G. apicola* are found at similarly low levels in the queen ileum  
589 and show sporadic abundance in the queen. These symmetrical occurrence patterns suggest  
590 antagonistic co-evolution of caste-specific gut bacteria, a hypothesis consistent with host age  
591 phenotype and development-specific pathogen strategies.

592  
593 Over 16 *L. kunkeei* genomes have been compared, revealing core functionality and a large  
594 variety of accessory protein clusters that characterize different strains [80]. Isolated from the gut  
595 of *A. mellifera*, strains MP2 and EFB6 of *L. kunkeei* were most related, and differ from other *L.*  
596 *kunkeei* in possessing genes implicated in gut colonization including cell adhesion, biofilm  
597 formation and horizontal transfer [35,80]. These likely represent strains that colonize the queen  
598 midgut and ileum. They may also colonize gut environments of workers and larva. That many of  
599 the *L. kunkeei* genomes lack gut-specific genes suggests they may lead more opportunistic life  
600 cycles within the hive and pollination environment. Similarly, the genome of  
601 *Parasaccharibacter apium* also reveals multiple functional traits for biofilm life in the insect gut,  
602 including survival in low oxygen environments and adhesion to host epithelium [44]. Like *S.*  
603 *alvi*, and many other AAB, *P. apium* can assimilate major fermentation byproducts generated by  
604 neighboring bacteria. Collectively this suggests that *P. apium* metabolism in the queen ileum  
605 may be somewhat analogous to *S. alvi* function in the worker ileum [57].

606  
607 Patterns of species co-occurrence suggest selection pressure for honey bee gut bacteria to co-  
608 exist with other bacteria in a biofilm encouraging competition and co-evolution (Fig. 4). This  
609 hypothesis is supported by the complex of highly correlated bacteria on the queen mouth, and  
610 strongly affiliated species pairs occurring regardless of niche. Not strongly associated with age,  
611 niche or background, at least three pairs of co-occurring species emerge as potential syntrophic  
612 relationships throughout the queen microbiota, and may rely on co-evolved traits to ensure niche  
613 occupation. This strategy would prove more effective in the queen gut, which provides a more  
614 stable long term environment where partnerships have more generational time to evolve. Many  
615 bacterial pairs have evolved strict affiliations with one another and multiple hive niches  
616 including *P. apium* / *L. kunkeei*, *G. apicola* / *S. alvi* and *L. firm4* / *Bifidobacterium* (Figs. 3 and  
617 4). Perhaps through their reliance on one another, core bacteria better survive within and outside  
618 their preferred niche.

619

## 620 **Conclusions**

621 The honey bee is a metabolic model for the effects of aging and diet on microbiota. Sampling the  
622 honey bee microbiota with respect to chronological age, biological age and environmental  
623 exposure facilitates an informative partitioning of variation associated with longevity  
624 phenotypes. Consistent with research on aging and host oxygen dynamics, the queen microbiota  
625 shifts towards the fermentative metabolism of well-known gram positive species, while the more  
626 rapidly aging worker is progressively depleted of these same species. Given the spectrum of  
627 influence of gut microbiota on worker physiology, we suggest that the queen microbiota serves a



628 similarly critical role in host signaling and protection. Separate evolutionary trajectories for  
629 caste-specific gut bacteria reflect overt differences in diet and longevity between workers and  
630 queens. This trajectory appears to have tracked division of labor evolution, perhaps involving  
631 key innovations like nectar concentration to produce honey, and the production of royal jelly in  
632 worker hypopharyngeal glands. Once considered bacteria associated with worker gut dysbiosis  
633 and larval nutrition, *L. kunkeei* and *P. apium* must now be understood as core gut bacteria of *Apis*  
634 *mellifera* queens. Our results suggest that these two species occupy a functional niche in the  
635 queen mouth, midgut and ileum. The co-occurrence and correlational abundance of multiple core  
636 species throughout the honey bee system suggest syntrophic relationships are commonplace.  
637 More generally, our study highlights the importance of controlled temporal and tissue-specific  
638 data to understand the total diversity and function of the honey bee microbiome.

639

## 640 **Abbreviations**

641 **16S rRNA gene:** 16S subunit of the ribosomal RNA gene **ANOVA:** Analysis of variance  
642 **AZ:** Arizona **BCA:** bicinchoninic acid **BLAST:** Basic local alignment search tool **bp:** Base  
643 pairs **CA:** California **CLR:** Centered log ratio **DistLM:** distance-based linear model  
644 **DNA:** Deoxyribonucleic acid **DNP:** 2,4-dinitrophenylhydrazine **FDR:** false discovery rate  
645 **GLM:** General linear models **MANOVA:** Multivariate analysis of variance **MANCOVA:**  
646 Multivariate analysis of covariance **OTU:** Operational taxonomic unit **PCA:** Principal  
647 Components Analysis **qPCR:** quantitative polymerase chain reaction **RDP:** Ribosomal  
648 Database Project **rRNA:** ribosomal ribonucleic acid **SparCC:** Sparse Correlations for  
649 Compositional data algorithm

650

## 651 **Declarations**

652• **Ethics approval and consent to participate:** Not applicable

653•

654 **Consent for publication :** Not applicable

655•

## 656 **Availability of data and material**

657 Honey bee queen datasets were deposited with the NCBI BioProject database. BioProject ID:  
658 PRJNA438524, <https://www.ncbi.nlm.nih.gov/Traces/study/?acc=SRP135870>  
659• Summary list view available here: <https://www.ncbi.nlm.nih.gov/sra/?term=SRP135870>  
660• Honey bee worker dataset can be accessed here: <https://doi.org/10.1126/sciadv.1600513>

661

## 662• **Competing interests**

663• The authors declare that they have no competing interests.

664

## 665 **Funding**

666 This research was funded by the ARS-USDA, research plan 501-2022-050 017.

667•

668 **Authors' contributions**

669 K.E.A. conceived of and designed the research. V.A.R. and B.M.M. contributed new analytical tools.  
670 V.A.R., B.M.M., D.C.C., A.C.F. and P.M. performed the experiments. K.E.A. V.A.R. and P.M. analyzed  
671 the data. K.E.A. wrote the manuscript. All authors read and approved the final manuscript.

672

673 **Acknowledgements**

674 The corresponding author thanks Belynda Starr, Ariel Calypso and Isaak El Spaghetto for their valuable  
675 input. We thank the BIO5 institute at the University of Arizona for amplicon sequencing , and two  
676 anonymous reviewers for providing helpful comments on the manuscript. The USDA/ARS is an equal  
677 opportunity employer and provider.

678•

679 **References**

680 1. Seeley TD. Adaptive significance of the age polyethism schedule in honeybee colonies. *Behav. Ecol.*  
681 *Sociobiol.* 1982;11:287–93.

682 2. Toth AL, Robinson GE. Worker nutrition and division of labour in honeybees. *Anim. Behav.*  
683 2005;69:427–35.

684 3. Korb J. Why do social insect queens live so long? Approaches to unravel the sociality-aging puzzle.  
685 *Curr. Opin. Insect Sci.* 2016;16:104–7.

686 4. Mao W, Schuler MA, Berenbaum MR. A dietary phytochemical alters caste-associated gene expression  
687 in honey bees. *Sci. Adv.* 2015;1:e1500795.

688 5. Kamakura M. Royalactin induces queen differentiation in honeybees. *Nature* 2012;84:994–1003.

689 6. Buttstedt A, Moritz RF, Erler S. More than royal food - Major royal jelly protein genes in sexuals and  
690 workers of the honeybee *Apis mellifera*. *Front Zool.* 2013;10:72.

691 7. Vojvodic S, Rehan SM, Anderson KE. Microbial Gut Diversity of Africanized and European Honey  
692 Bee Larval Instars. *PLoS One.* 2013;8:e72106.

693 8. Haddad LS, Kelbert L, Hulbert AJ. Extended longevity of queen honey bees compared to workers is  
694 associated with peroxidation-resistant membranes. *Exp. Gerontol.* 2007;42:601–9.

695 9. Corona M, Hughes KA, Weaver DB, Robinson GE. Gene expression patterns associated with queen  
696 honey bee longevity. *Mech. Ageing Dev.* 2005;126:1230–8.

697 10. Remolina SC, Hughes KA. Evolution and mechanisms of long life and high fertility in queen honey  
698 bees. *Age* 2008;30:177–85.

699 11. Yang W, Tian Y, Han M, Miao X. Longevity extension of worker honey bees (*Apis mellifera*) by  
700 royal jelly: optimal dose and active ingredient. 2017;5:e3118.

701 12. Anderson KE, Ricigliano VA. Honey bee gut dysbiosis: A novel context of disease ecology. *Curr.*  
702 *Opin. Insect Sci.* 2017;22:125-132.

703 13. Engel P, Kwong WK, McFrederick Q, Anderson KE, Barribeau M, Chandler JA, et al. The Bee  
704 Microbiome: Impact on Bee Health and Model for Evolution and Ecology of Host-Microbe Interactions  
705 *mBIO* 2016;7:1–9.

- 706 14. Amdam GV, Omholt SW. The regulatory anatomy of honeybee lifespan. *J. Theor. Biol.*  
707 2002;216:209–28.
- 708 15. Amdam G V., Norberg K, Hagen A, Omholt SW. Social exploitation of vitellogenin. *Proc. Natl.*  
709 *Acad. Sci.* 2003;100:1799–802.
- 710 16. Corona M, Velarde RA, Remolina S, Moran-Lauter A, Wang Y, Hughes KA, et al. Vitellogenin,  
711 juvenile hormone, insulin signaling, and queen honey bee longevity. *Proc. Natl. Acad. Sci.*  
712 2007;104:7128–33.
- 713 17. Amdam GV, Simões ZLP, Hagen A, Norberg K, Schröder K, Mikkelsen Ø, et al. Hormonal control of  
714 the yolk precursor vitellogenin regulates immune function and longevity in honeybees. *Exp. Gerontol.*  
715 2004;39:767–73.
- 716 18. Seehuus S-C, Norberg K, Gimsa U, Krekling T, Amdam G V. Reproductive protein protects  
717 functionally sterile honey bee workers from oxidative stress. *Proc. Natl. Acad. Sci.* 2006;103:962–7.
- 718 19. Kwong WK, Medina LA, Koch H, Sing K-W, Jia E, Soh Y, et al. Dynamic microbiome evolution in  
719 social bees. *Sci. Adv.* 2017;3:e1600513.
- 720 20. Tarpy DR, Mattila HR, Newton ILG. Development of the honey bee gut microbiome throughout the  
721 queen-rearing process. *Appl. Environ. Microbiol.* 2015;81:3182–91.
- 722 21. Vojvodic S, Johnson BR, Harpur BA, Kent CF, Zayed A, Anderson KE, et al. The transcriptomic and  
723 evolutionary signature of social interactions regulating honey bee caste development. *Ecol. Evol.*  
724 2015;5:4795–807.
- 725 22. Anderson KE, Rodrigues PAP, Mott BM, Maes P, Corby-Harris V. Ecological Succession in the  
726 Honey Bee Gut: Shift in *Lactobacillus* Strain Dominance During Early Adult Development. *Microb.*  
727 *Ecol.* 2016;71:1008–19.
- 728 23. Powell JE, Martinson VG, Urban-Mead K, Moran NA. Routes of acquisition of the gut microbiota of  
729 the honey bee *Apis mellifera*. *Appl. Environ. Microbiol.* 2014;80:7378–87.
- 730 24. Ricigliano VA, Fitz W, Copeland DC, Mott BM, Maes P, Floyd AS, et al. The impact of pollen  
731 consumption on honey bee (*Apis mellifera*) digestive physiology and carbohydrate metabolism. *Arch.*  
732 *Insect Biochem. Physiol.* 2017;96:1–14.
- 733 25. Zheng H, Powell JE, Steele MI, Dietrich C, Moran NA. Honeybee gut microbiota promotes host  
734 weight gain via bacterial metabolism and hormonal signaling. *Proc. Natl. Acad. Sci.* 2017;114:4775–80.
- 735 26. Powell JE, Leonard SP, Kwong WK, Engel P, Moran NA. Genome-wide screen identifies host  
736 colonization determinants in a bacterial gut symbiont. *Proc. Natl. Acad. Sci.* 2016;113:13887–92.
- 737 27. Kwong WK, Mancenido AL, Moran NA. Immune system stimulation by the native gut microbiota of  
738 honey bees. *R. Soc. Open Sci.* 2017;4:170003.
- 739 28. Emery O, Schmidt K, Engel P. Immune system stimulation by the gut symbiont *Frischella perrara* in  
740 the honey bee (*Apis mellifera*). *Mol. Ecol.* 2017; 26:2576-2590.
- 741 29. Maes PW, Rodrigues PAP, Oliver R, Mott BM, Anderson KE. Diet-related gut bacterial dysbiosis  
742 correlates with impaired development, increased mortality and *Nosema* disease in the honeybee (*Apis*  
743 *mellifera*). *Mol. Ecol.* 2016;25:5439–50.

- 744 30. Buford TW. (Dis)Trust your gut: the gut microbiome in age-related inflammation, health, and disease.  
745 Microbiome; 2017;5:80.
- 746 31. Kapheim KM, Rao VD, Yeoman CJ, Wilson BA, White BA, Goldenfeld N, et al. Caste-specific  
747 differences in hindgut microbial communities of honey bees (*Apis mellifera*). PLoS One 2015;10:1–14.
- 748 32. Anderson KE, Carroll MJ, Sheehan TIM, Mott BM. Hive-stored pollen of honey bees: many lines of  
749 evidence are consistent with pollen preservation, not nutrient conversion. Mol. Ecol. 2014;23: 5904–5917.
- 750 33. Corby-Harris V, Snyder LA, Schwan MR, Maes P, McFrederick QS, Anderson KE. Origin and Effect  
751 of Alpha 2.2 Acetobacteraceae in Honey Bee Larvae and Description of *Parasaccharibacter apium* gen.  
752 nov., sp. nov. Appl. Environ. Microbiol. 2014;80:7460–72.
- 753 34. Cariveau DP, Powell JE, Koch H, Winfree R, Moran NA. Variation in gut microbial communities and  
754 its association with pathogen infection in wild bumble bees (*Bombus*). ISME J. 2014;8:2369–79.
- 755 35. Djukic M, Poehlein A, Strauß J, Tann FJ, Leimbach A, Hoppert M, et al. High quality draft genome  
756 of *Lactobacillus kunkeei* EFB6, isolated from a German European foulbrood outbreak of honeybees.  
757 Stand. Genomic Sci. 2015;10:16.
- 758 36. Endo A, Salminen S. Honeybees and beehives are rich sources for fructophilic lactic acid bacteria.  
759 Syst. Appl. Microbiol. 2013;36:444–8.
- 760 37. Martinson VG, Moy J, Moran NA. Establishment of characteristic gut bacteria during development of  
761 the honeybee worker. Appl. Environ. Microbiol. 2012;78:2830–40.
- 762 38. Hsieh Y-S, Hsu C-Y. Honeybee trophocytes and fat cells as target cells for cellular senescence  
763 studies. Exp. Gerontol. 2011;46:233–40.
- 764 39. Smith PK, Krohn RI, Hermanson GT, Mallia AK, Gartner FH, Provenzano MD, et al. Measurement  
765 of protein using bicinchoninic acid. Anal. Biochem. 1985;150:76–85.
- 766 40. Liu CM, Aziz M, Kachur S, Hsueh P-R, Huang Y-T, Keim P, et al. BactQuant: An enhanced broad-  
767 coverage bacterial quantitative real-time PCR assay. BMC Microbiol. 2012;12:56.
- 768 41. Schloss PD, Westcott SL, Ryabin T, Hall JR, Hartmann M, Hollister EB, et al. Introducing mothur:  
769 open-source, platform-independent, community-supported software for describing and comparing  
770 microbial communities. Appl. Environ. Microbiol. 2009;75:7537–41.
- 771 42. Edgar RC, Haas BJ, Clemente JC, Quince C, Knight R. UCHIME improves sensitivity and speed of  
772 chimera detection. Bioinformatics. 2011;27:2194–200.
- 773 43. Wang Q, Garrity GM, Tiedje JM, Cole JR. Naive Bayesian classifier for rapid assignment of rRNA  
774 sequences into the new bacterial taxonomy. Appl. Environ. Microbiol. 2007;73:5261–7.
- 775 44. Chouaia B, Gaiarsa S, Crotti E, Comandatore F, Esposti MD, Ricci I, et al. Acetic acid bacteria  
776 genomes reveal functional traits for adaptation to life in insect guts. Genome Biol. Evol. 2014;6:912–20.
- 777 45. Větrovský T, Baldrian P. The Variability of the 16S rRNA Gene in Bacterial Genomes and Its  
778 Consequences for Bacterial Community Analyses. PLoS One. 2013;8:1–10.
- 779 46. Pearson K. Mathematical Contributions to the Theory of Evolution.-On a Form of Spurious  
780 Correlation Which May Arise When Indices Are Used in the Measurement of Organs. Proc. R. Soc.  
781 London 1896;60:489–98.

- 782 47. Gloor GB, Reid G. Compositional analysis: a valid approach to analyze microbiome high throughput  
783 sequencing data. *Can. J. Microbiol.* 2016;703:cjm-2015-0821.
- 784 48. Comas M. CoDaPack 2.0: a stand-alone, multi-platform compositional software. *Options.* 2011;1–10.
- 785 49. Friedman J, Alm EJ. Inferring Correlation Networks from Genomic Survey Data. *PLoS Comput. Biol.*  
786 2012;8:1–11.
- 787 50. Weiss S, Van Treuren W, Lozupone C, Faust K, Friedman J, Deng Y, et al. Correlation detection  
788 strategies in microbial data sets vary widely in sensitivity and precision. *ISME J* 2016;10:1–13.
- 789 51. 2013 SAS Institute Inc. 2013. Base SAS® 9.4 Procedures Guide. Cary, NC: SAS Institute Inc.
- 790 52. Seehuus S-C, Norberg K, Gimsa U, Krekling T, Amdam GV. Reproductive protein protects  
791 functionally sterile honey bee workers from oxidative stress. *Proc. Natl. Acad. Sci.* 2006;103:962–7.
- 792 53. Amdam G V. Social context, stress, and plasticity of aging. *Aging Cell.* 2011;10:18–27.
- 793 54. Engel P, Bartlett K, Moran NA. The Bacterium *Frischella perrara* Causes Scab Formation in the Gut  
794 of its Honey bee host. *MBio.* 2015;18:1255–7.
- 795 55. Bonilla-Rosso G, Engel P. Functional roles and metabolic niches in the honey bee gut microbiota.  
796 *Curr. Opin. Microbiol.* 2018;43:69–76.
- 797 56. Kwong WK, Engel P, Koch H, Moran NA. Genomics and host specialization of honey bee and  
798 bumble bee gut symbionts. *Proc. Natl. Acad. Sci.* 2014;111:11509–14.
- 799 57. Kwong WK, Moran NA. Gut microbial communities of social bees. *Nat. Rev. Microbiol.*  
800 2016;14:374–84.
- 801 58. Moran NA, Hansen AK, Powell JE, Sabree ZL. Distinctive Gut Microbiota of Honey Bees Assessed  
802 Using Deep Sampling from Individual Worker Bees. *PLoS One* 2012;7:e36393.
- 803 59. Kešnerová L, Mars RAT, Ellegaard KM, Troilo M. Disentangling metabolic functions of bacteria in  
804 the honey bee gut. *PLoS Biol.* 2017;15:e2003467.
- 805 60. Corby-Harris V, Maes P, Anderson KE. The Bacterial Communities Associated with Honey Bee  
806 (*Apis mellifera*) Foragers. *PLoS One* 2014;9:e95056.
- 807 61. Horton MA, Oliver R, Newton IL. No apparent correlation between honey bee forager gut microbiota  
808 and honey production. *PeerJ* 2015;3:e1329.
- 809 62. Rothman JA, Carroll MJ, Meikle WG, Anderson KE, McFrederick QS. Longitudinal Effects of  
810 Supplemental Forage on the Honey Bee (*Apis mellifera*) Microbiota and Inter- and Intra-Colony  
811 Variability. *Microb. Ecol.* 2018;
- 812 63. Yun J-H, Jung M-J, Kim PS, Bae J-W. Social status shapes the bacterial and fungal gut communities  
813 of the honey bee. *Sci. Rep.* 2018;8:2019.
- 814 64. Jones JC, Fruciano C, Hildebrand F, Al Toufalilia H, J Balfour N, Bork P, et al. Gut microbiota  
815 composition is associated with environmental landscape in honey bees. *Ecol. Evol.* 2017;441–51.
- 816 65. Keller L, Jemielity S. Social insects as a model to study the molecular basis of ageing. *Exp. Gerontol.*  
817 2006;41:553–6.

- 818 66. Amiri E, Strand MK, Rueppell O, Tarpay DR. Queen quality and the impact of honey bee diseases on  
819 queen health: Potential for interactions between two major threats to colony health. *Insects*. 2017;8:22–6.
- 820 67. Rivière A, Selak M, Lantin D, Leroy F, De Vuyst L. *Bifidobacteria* and butyrate-producing colon  
821 bacteria: Importance and strategies for their stimulation in the human gut. *Front. Microbiol.* 2016;7: 979.
- 822 68. Hu YT, Wu TC, Yang EC, Wu PC, Lin PT, Wu YL. Regulation of genes related to immune signaling  
823 and detoxification in *Apis mellifera* by an inhibitor of histone deacetylation. *Sci. Rep.* 2017;7:1–14.
- 824 69. Heylen K, Gobin B, Billen J, Hu TT, Arckens L, Huybrechts R. Amfor expression in the honeybee  
825 brain: A trigger mechanism for nurse-forager transition. *J. Insect Physiol.* 2008;54:1400–3.
- 826 70. Suzuki MT, Giovannoni SJ. Bias caused by template annealing in the amplification of mixtures of  
827 16S rRNA genes by PCR†. 1996;62:2–8.
- 828 71. Ward KN, Coleman JL, Clinnin K, Fahrbach S, Rueppell O. Age, caste, and behavior determine the  
829 replicative activity of intestinal stem cells in honeybees (*Apis mellifera* L.). *Exp. Gerontol.* 2008;43:530–  
830 7.
- 831 72. vanEngelsdorp D, Tarpay DR, Lengerich EJ, Pettis JS. Idiopathic brood disease syndrome and queen  
832 events as precursors of colony mortality in migratory beekeeping operations in the eastern United States.  
833 *Prev. Vet. Med.* 2013;108:225–33.
- 834 73. Corby-Harris V, Snyder L, Meador CAD, Naldo R, Mott B, Anderson KE. *Parasaccharibacter*  
835 *apium*, gen. Nov., sp. Nov., Improves Honey Bee (Hymenoptera: Apidae) resistance to *Nosema*. *J. Econ.*  
836 *Entomol.* 2016;109:537–43.
- 837 74. Alberoni D, Gaggia F, Baffoni L, Di Gioia D. Beneficial microorganisms for honey bees: problems  
838 and progresses. *Appl. Microbiol. Biotechnol.* 2016;100:9469–82.
- 839 75. McFrederick QS, Wcislo WT, Taylor DR, Ishak HD, Dowd SE, Mueller UG. Environment or kin:  
840 whence do bees obtain acidophilic bacteria? *Mol. Ecol.* 2012;21:1754–68.
- 841 76. Graystock P, Rehan SM, McFrederick QS. Hunting for healthy microbiomes: determining the core  
842 microbiomes of *Ceratina*, *Megalopta*, and *Apis* bees and how they associate with microbes in bee  
843 collected pollen. *Conserv. Genet.* 2017;18:701–11.
- 844 77. McFrederick QS, Thomas JM, Neff JL, Vuong HQ, Russell KA, Hale AR, et al. Flowers and Wild  
845 Megachilid Bees Share Microbes. *Microb. Ecol.* 2016;1–13.
- 846 78. McFrederick QS, Wcislo WT, Hout MC, Mueller UG. Host species and developmental stage, but not  
847 host social structure, affects bacterial community structure in socially polymorphic bees. *FEMS*  
848 *Microbiol. Ecol.* 2014;88:398–406.
- 849 79. McFrederick QS, Rehan SM. Characterization of pollen and bacterial community composition in  
850 brood provisions of a small carpenter bee. *Mol. Ecol.* 2016;25:2302–11.
- 851 80. Asenjo F, Olmos A, Henríquez-Piskulich P, Polanco V, Aldea P, Ugalde JA, et al. Genome  
852 sequencing and analysis of the first complete genome of *Lactobacillus kunkeei* strain MP2, an *Apis*  
853 *mellifera* gut isolate. 2016;4:e1950.

854

855

856 Table 1. Results examining bacterial abundance by age, niche and carbonyl accumulation.

| Category, species or OTU <sup>A</sup> |                                      | Abundant or Rare <sup>B</sup> | Percent change w/age <sup>C</sup> | Wilcoxon rank sum test <sup>D</sup> | MANOVA <sup>E</sup> |         |
|---------------------------------------|--------------------------------------|-------------------------------|-----------------------------------|-------------------------------------|---------------------|---------|
| <b>Mouth</b>                          |                                      |                               |                                   |                                     | F value             | Pr>F    |
|                                       | <i>Lactobacillus Firm5</i>           | A                             | + 59                              | 0.03                                | -                   | ns      |
|                                       | * <i>Lactobacillus Firm4</i>         | R                             | + 195                             | 0.03                                | -                   | ns      |
|                                       | <i>Parasaccharibacter apium</i> **   | A                             | + 341                             | 0.02                                | -                   | ns      |
|                                       | Acetobacteraceae Alpha2.1            | A                             | - 97                              | ns                                  | 7.8                 | 0.007   |
|                                       | <i>Snodgrassella alvi</i>            | R                             | + 121                             | 0.01                                | 5.6                 | 0.02    |
|                                       | <i>Delftia</i> (Burkholdariales)     | R                             | - 53                              | 0.0001                              | 12.4                | 0.0008  |
|                                       | Diversity (Σ OTUs 10-500)            | R                             | - 4                               | ns                                  | 4.5                 | 0.04    |
| <b>Midgut</b>                         |                                      |                               |                                   |                                     |                     |         |
|                                       | <i>Bifidobacterium</i> **            | R                             | + 242                             | 0.01                                | 14.1                | 0.0004  |
|                                       | <i>Lactobacillus kunkeei</i> **      | A                             | + 336                             | 0.01                                | 5.2                 | 0.03    |
|                                       | Acetobacteraceae Alpha2.1            | R                             | - 79                              | 0.005                               | -                   | ns      |
|                                       | * <i>Delftia</i> (Burkholdariales)** | R                             | - 93                              | <0.0001                             | 26.2                | <0.0001 |
|                                       | *Diversity (Σ OTUs 10-500)           | R                             | - 69                              | 0.002                               | 10.1                | 0.002   |
| <b>Ileum</b>                          |                                      |                               |                                   |                                     |                     |         |
|                                       | <i>Bifidobacterium</i> **            | A                             | + 164                             | ns                                  | 5.9                 | 0.02    |
|                                       | <i>Lactobacillus Firm5</i> **        | A                             | + 9                               | ns                                  | -                   | ns      |
|                                       | * <i>Lactobacillus kunkeei</i>       | A                             | + 248                             | ns                                  | 6.4                 | 0.01    |
|                                       | Acetobacteraceae Alpha2.1            | A                             | - 90                              | 0.0006                              | 7.1                 | 0.01    |
|                                       | * <i>Parasaccharibacter apium</i>    | A                             | - 50                              | 0.02                                | -                   | ns      |
|                                       | * <i>Snodgrassella alvi</i>          | A                             | + 279                             | ns                                  | 11.42               | 0.001   |
|                                       | * <i>Gilliamella apicola</i> **      | R                             | - 69                              | 0.02                                | -                   | ns      |
|                                       | <i>Delftia</i> (Burkholdariales)**   | R                             | - 94                              | <0.0001                             | 36.2                | <0.0001 |
|                                       | *Diversity (Σ OTUs 10-500)           | R                             | - 71                              | <0.0001                             | 6.7                 | 0.01    |
| <b>Rectum</b>                         |                                      |                               |                                   |                                     |                     |         |
|                                       | <i>Bifidobacterium</i> **            | A                             | + 212                             | 0.001                               | 15.5                | 0.0002  |
|                                       | <i>Lactobacillus Firm5</i>           | A                             | - 33                              | 0.03                                | 9.3                 | 0.004   |
|                                       | Acetobacteraceae Alpha2.1            | A                             | - 76                              | 0.009                               | -                   | ns      |
|                                       | * <i>Parasaccharibacter apium</i> ** | A                             | - 78                              | 0.04                                | 11.7                | 0.001   |
|                                       | * <i>Snodgrassella alvi</i>          | R                             | + 984                             | 0.006                               | 11.4                | 0.001   |
|                                       | * <i>Delftia</i> (Burkholdariales)** | R                             | - 92                              | <0.0001                             | 35.7                | <0.0001 |
|                                       | Diversity (Σ OTUs 10-500)            | R                             | + 3                               | ns                                  | 6.3                 | 0.02    |

857 <sup>A</sup> Dependent variables are absolute abundance of OTUs 1-9 corrected for community size (qPCR) and species 16S copy number.

858 Remaining OTU reads summed (Σ OTUs 10-500), corrected for community size and mean 16S copy number (4.2).

859 <sup>B</sup> Rare = < 1% mean bacterial cell number by niche (Table S2).

860 <sup>C</sup> Average percent change in bacterial cell number with age. We note that cell number loss cannot exceed 100%.

861 <sup>D</sup> Comparing species-specific bacterial cell number by chronological age only (Table S4).

862 <sup>E</sup> Independent variables are queen age and background (df = 3, 59). Reports only F- values for chronological age effects

863 Examining the top 9 most abundant OTUs and non-core diversity abundance = (Σ OTUs 10-500).

864 \* Significant interaction effect of age and background detected by the 2-way MANOVA (Table S8).

865 \*\* Significant MANCOVA result and Pearson correlation of bacterial abundance and carbonyl accumulation (Tables S9).

866

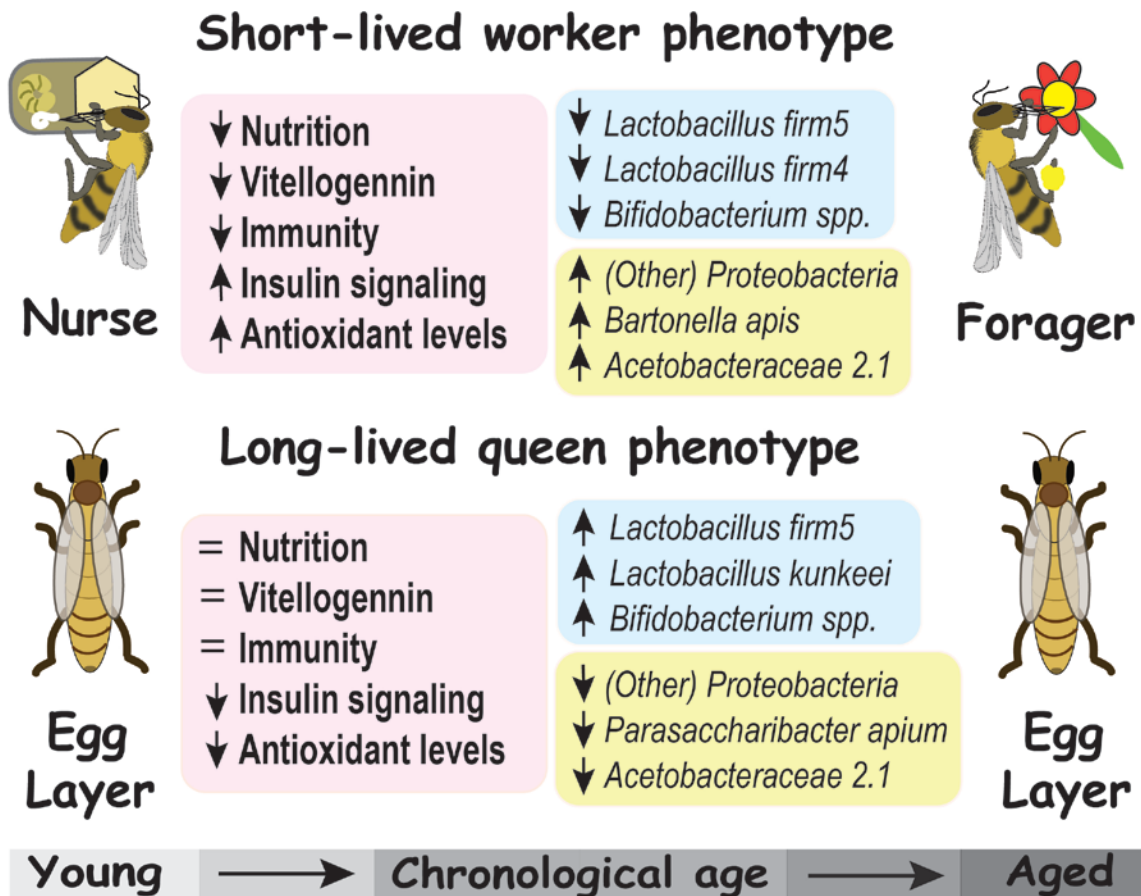

867  
 868 Figure 1. Age associated bacterial succession of extreme longevity phenotypes. Honey bee host  
 869 differences (pink panels) reflect aging physiology. In the context of life history theory workers  
 870 are literally the “disposable soma”, while queens represent reproduction [10] . Vertical arrows  
 871 indicate the direction of change with increasing age. Firmicutes are listed in the blue panels, and  
 872 Proteobacteria in the yellow panels. All listed bacterial groups differ significantly in ratio  
 873 abundance. The microbiota of the short-lived worker phenotype represents a metaanalysis of  
 874 *Apis mellifera* gut libraries from Kwong *et al.* [19]. Queens were analyzed in the present study  
 875 (see results; Tables 1, S4).  
 876



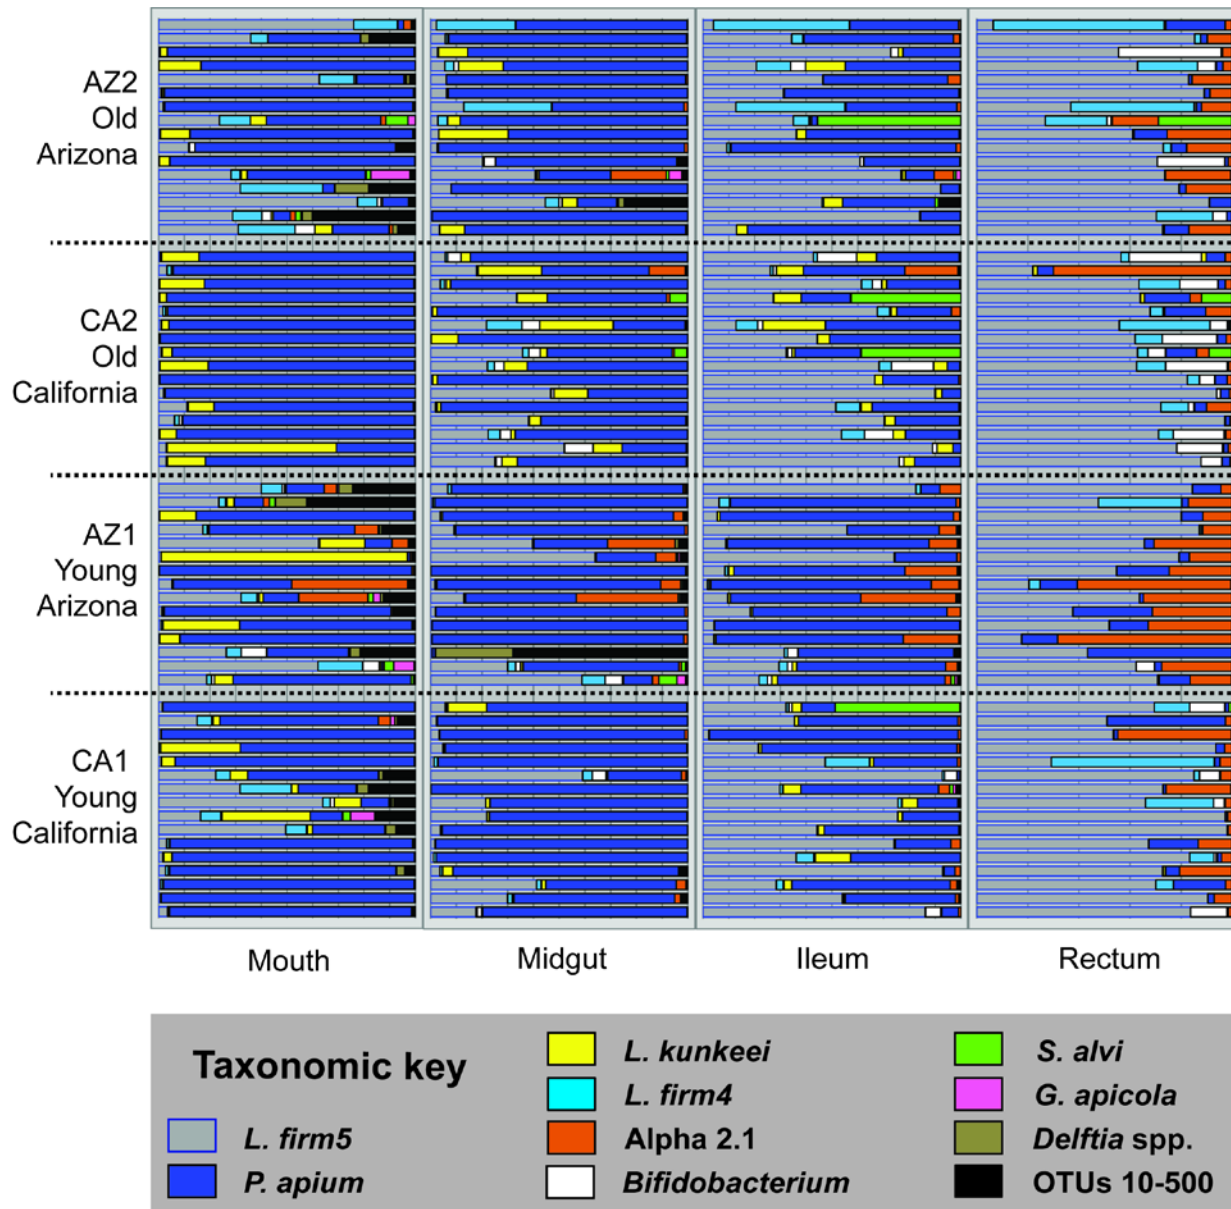

877

878

879 Figure 2. The honey bee queen microbiota by tissue. Color coded bars represents relative  
 880 abundance corrected by species-specific 16S rRNA gene copy number. (See Table S3 for  
 881 absolute abundance). The 4x4 panel displays the top 9 most abundant OTUs by niche, age and  
 882 source. Black represents “diversity abundance”, the summation of OTUs 10-500. Old queens in  
 883 the upper two rows are 16-18 months of age and young queens in the bottom two rows are aged  
 884 4.5-5.7 months (Fig. 4).

885

886

887

888

889

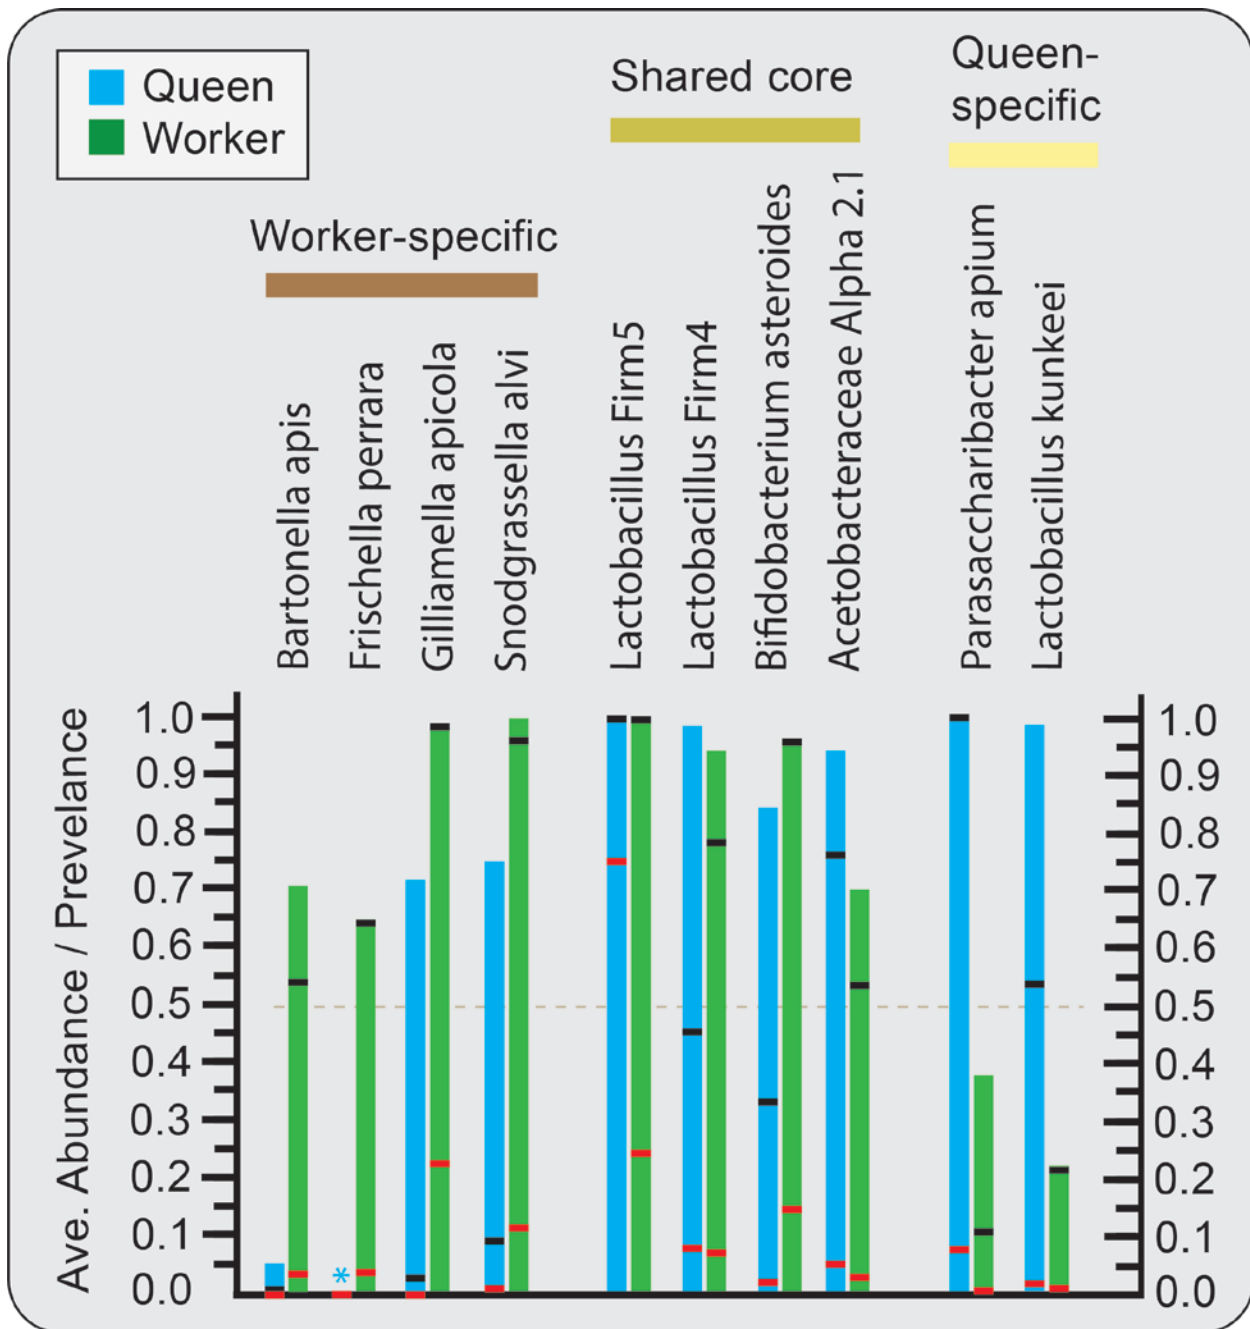

890

891

892

893 Figure 3. Abundance and prevalence of gut bacteria in queens (n = 63) and workers (n = 83).

894 Workers are whole gut samples from Kwong *et al.* [19]. Queen data was normalized by tissue-  
895 specific community size to reflect relative abundance values expected from sampling whole guts.

896 The red bars represent average abundance, black bars are prevalence defined at  $\geq 0.5\%$  relative

897 abundance, and the bar apex is prevalence defined as 2 or more reads per gut library. We did not

898 detect *F. perrara*\* in any of the four sampled queen alimentary tract niches.

899

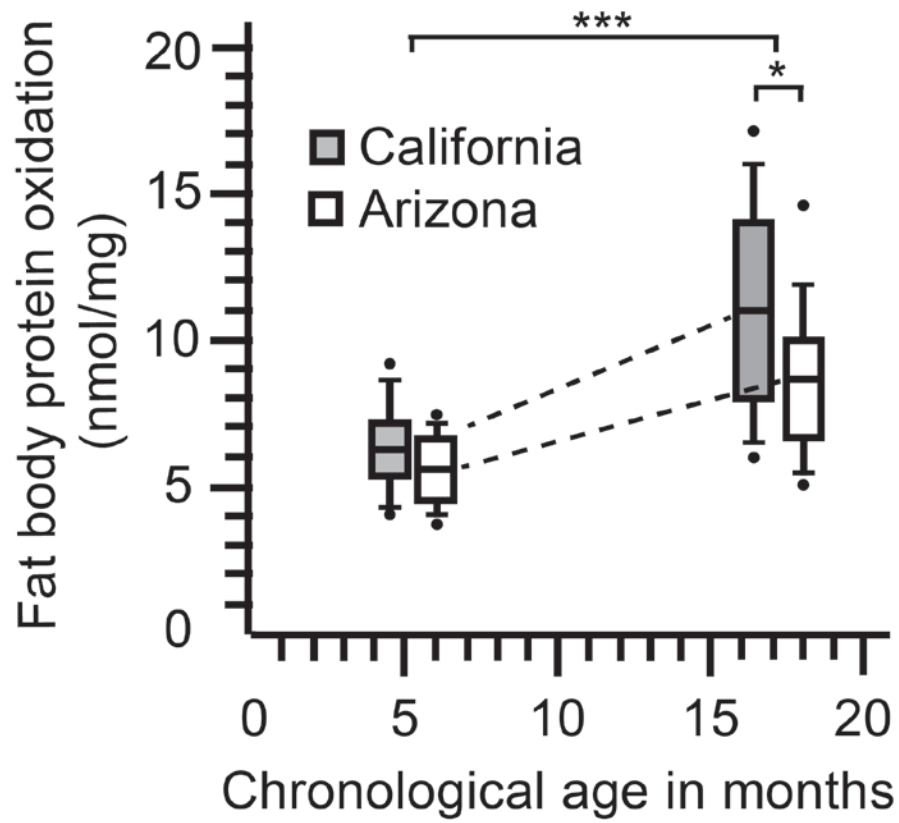

900  
901  
902  
903  
904  
905  
906  
907  
908  
909  
910

Figure 4. Carbonyl accumulation (protein oxidation) in queen fat body differs by chronological age ( $F_{3, 59} = 48.3$ ;  $P < 0.0001^{***}$ ), and source: ( $t = 2.2$ ;  $df = 30$ ,  $P = 0.03^{*}$ ).

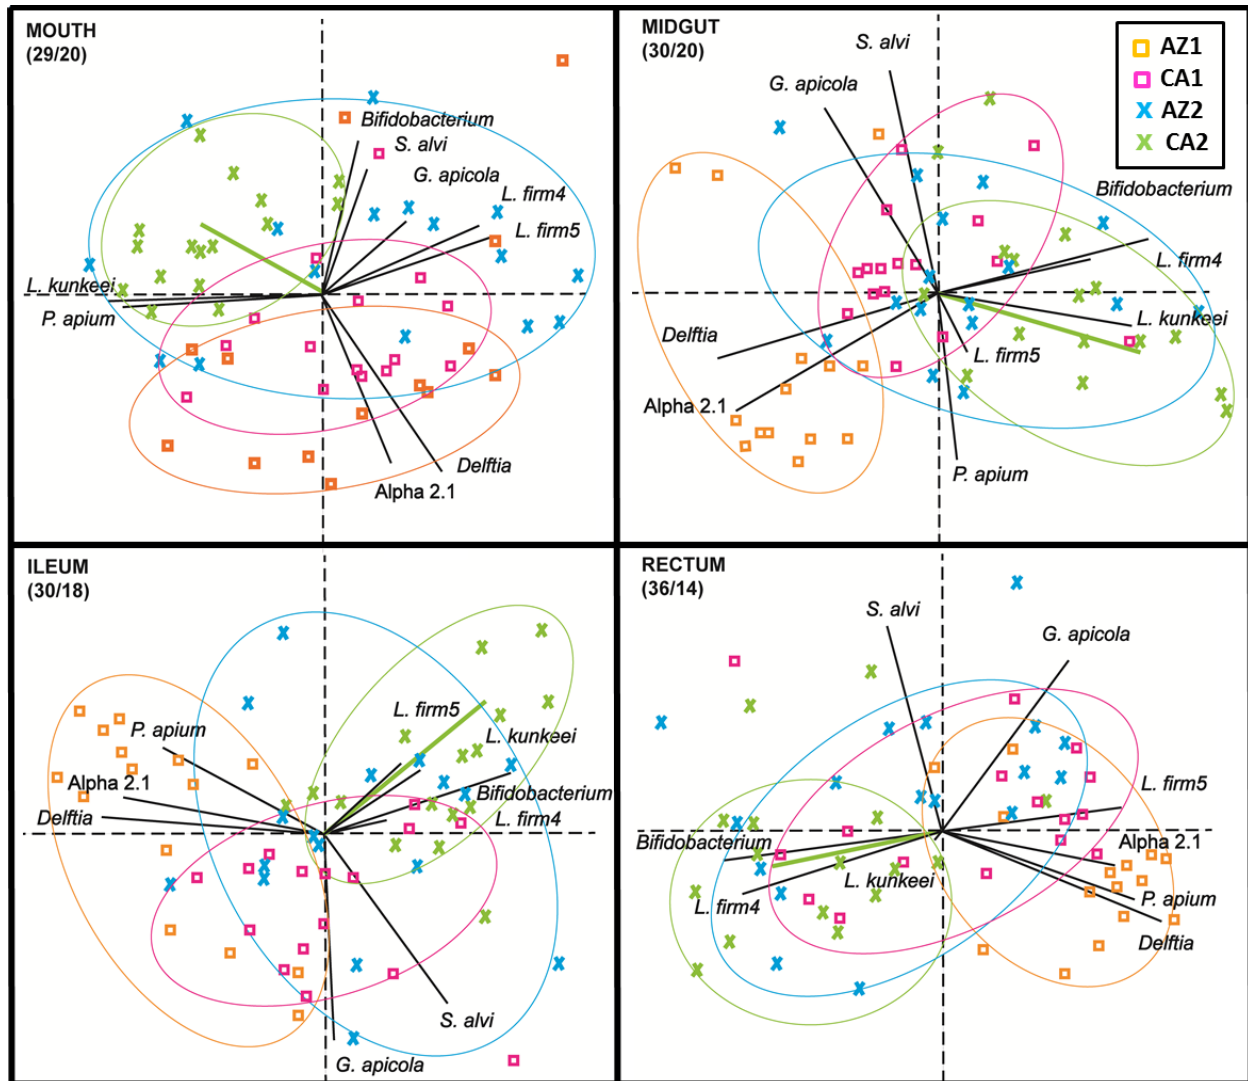

911

912 Figure 5. Principle components analysis by niche based on the top 9 most abundant OTUs and  
913 carbonyl accumulation. The colored symbols illustrate differences among the chronological  
914 sample cohorts; Pink and orange are young, blue and green are old. The green vector illustrates  
915 carbonyl accumulation relative to community structure, shows strong affinity with increased  
916 Firmicutes in the gut and is largely allied with the biologically oldest queen cohort (green  
917 symbols). Orange symbols are biologically youngest and consistently allied with *P. apium* in the  
918 hindgut, and Acetobacteraceae Alpha 2.1 and *Delftia* throughout the system. Biplot constructed  
919 with bacterial cell abundance data, transformed to centered log ratios (CLR) that represent the  
920 change in taxon abundance (covariance) relative to all other taxa in the data set. Thus the species  
921 vectors are proportional to the standard deviation of the ratio of each taxon to all other taxa. In  
922 general, clustered groups of points contain similar groupings of taxa with similar ratio  
923 abundances, and longer OTU vectors result from greater variation in CLR scores. The  
924 parentheses below each niche label contain the percent variation explained by the first and  
925
